# Supplementary material
Source: PubMed Central journal article supplement (PMC5894059)
Supplement: bm7b01717_si_001.pdf [file bm7b01717_si_001.pdf]

## Supporting Information for

# Guanidinium-functionalized Interpolyelectrolyte Complexes Enabling RNAi in Resistant Insect Pests

Keith H. Parsons,<sup>†</sup> Mosharrof H. Mondal,<sup>‡</sup> Charles L. McCormick,<sup>†§</sup> Alex S. Flynt<sup>\*‡</sup>

<sup>†</sup>Department of Polymer Science and Engineering, The University of Southern Mississippi, Hattiesburg, MS 39406.

<sup>‡</sup>Department of Biological Sciences, The University of Southern Mississippi, Hattiesburg, MS 39406

<sup>§</sup>Department of Chemistry and Biochemistry, The University of Southern Mississippi, Hattiesburg, MS 39406

### Primers Used in this Study.

#### dsRNA Synthesis

|                    |                                          |
|--------------------|------------------------------------------|
| SfV-ATPase_dsRNA F | GAGGCTCTTCGTGAGATCTCAGG                  |
| SfV-ATPase_dsRNA R | GAAACGATCGTATGACGAGTAGCTG                |
| SfCDC27_dsRNA F    | ATTGTTCAAGAACCTATACAGGTTATCGTTTG         |
| SfCDC27_dsRNA R    | CAGGAGCTTGAGTCTCTGGTGTGATGCTGG           |
| M13 F              | TGTAACGACGACGGCCAGT                      |
| Sp6-T7 R           | TAATACGACTCACTATAGGGAGCTCTCCCATATGGTGCAG |

#### RT-qPCR

|                   |                                |
|-------------------|--------------------------------|
| SfV-ATPase_qPCR F | TGTCCGTTCTACAAGACCGTGG         |
| SfV-ATPase_qPCR R | TCACGGATGACGTTCCAGGTG          |
| sfCDCqPCR F       | CATGCCACTGACCACACTATGC         |
| sfCDCqPCR R       | TGTCACACCCAACAATGTGGC          |
| SfKIF23qPCR F     | AAGGAACTGATGGCACATTTGGAAATGAGG |
| SfKIF23qPCR R     | AGTGGCGGTCAAGCGTTCTTCCAGAGCTCT |
| dsRNA_CDC27 F     | CCACCAAGATGATTGTTCAAG          |
| dsRNA_CDC27 R     | GAGTCTCTGGTGTGATGCTGG          |
| SfActin_qPCR F    | AGATGACACAGATCATGTTCCG         |
| SfActin_qPCR R    | GAGATCCACATCTGTTGGAAG          |
| GFP_qPCR F        | TGAAGTTCATCTGCACCACCGG         |
| GFP_qPCR R        | TTGAAGAAGTCGTGCTGGCG           |

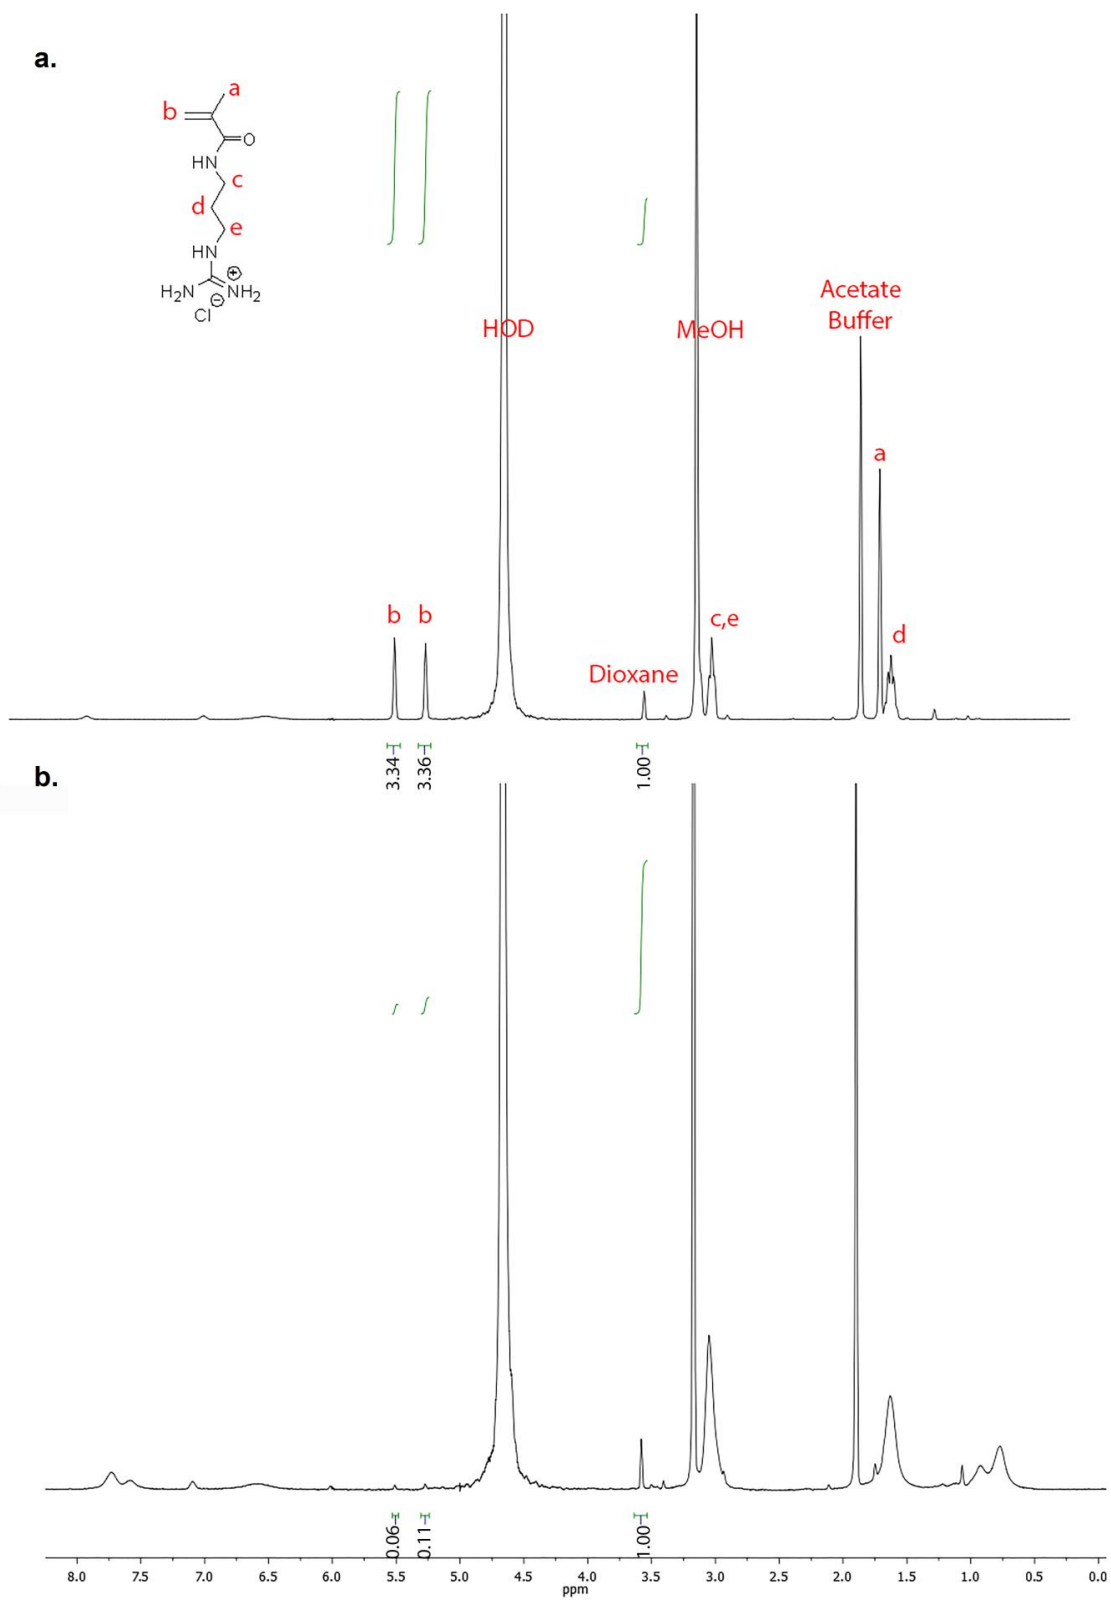

Figure S1.  $^1\text{H}$  NMR spectra of pGPMA polymerization aliquots taken at (a)  $t_0$  and (b) 19 hr.

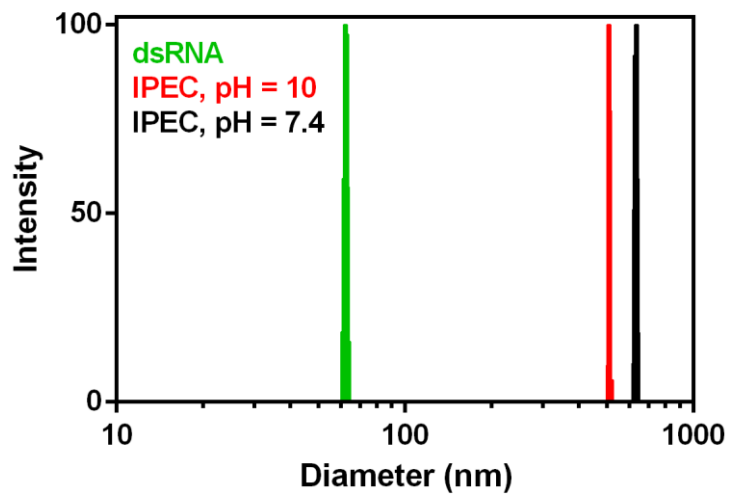

Figure S2. Hydrodynamic size histograms for pGPMA-dsRNA IPEC (8x weight ratio) at pH = 7.4 (black) and pH = 10 (red) and free dsRNA (pH = 7.4, green) as determined by dynamic light scattering (DLS) at 90° scattering angle.

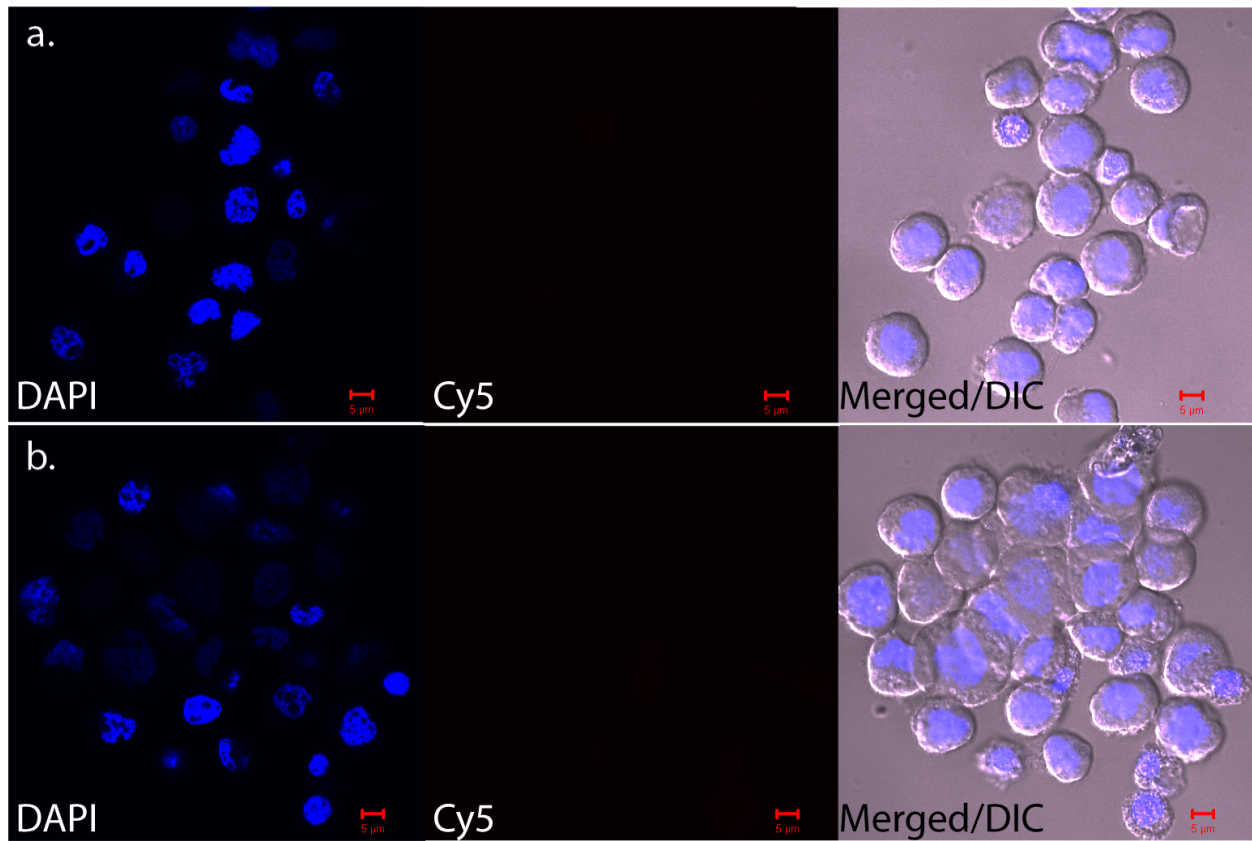

**Figure S3. Sf9 cells treated with free Cy5-labeled dsRNA (red) after (a, top row) 24 hrs and (b, bottom row) 48 hrs. Nuclei were stained with DAPI (blue). Scale bars = 5 μm.**

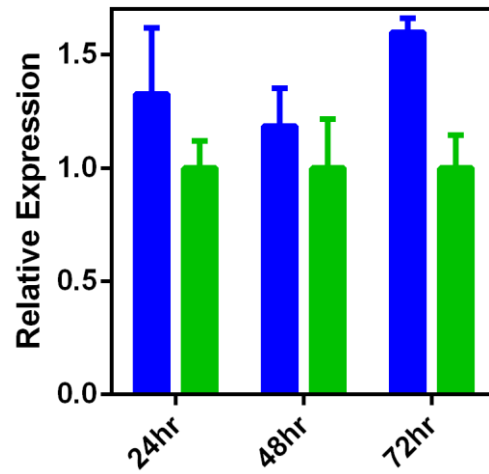

**Figure S4. Expression of CDC27 determined by RT-qPCR in Sf9 cells following incubation with free pGPMA at identical concentration as used for 8x IPEC. Blue bars represent expression when polymer is added; green represents no treatment. Values are normalized to respective untreated controls. Error bars represent SEM.**

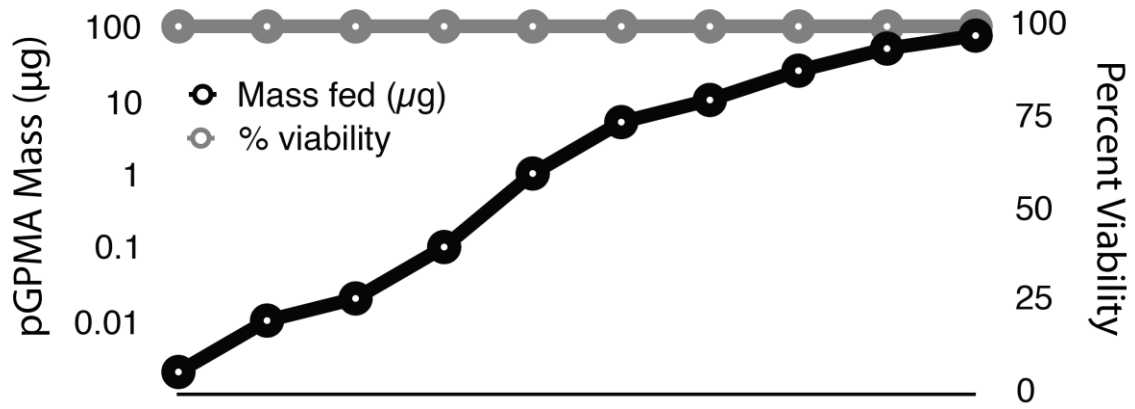

Figure S5. Survival of fall armyworm larvae after ingestion of pGPMA. Animals were directly fed masses indicated on the left y-axis (black line). The percentage of animals viable after feeding on right y-axis (grey line). (N = 4)
